# Supplementary material for: Effects of virtual reality-based intervention on depression in stroke patients: a meta-analysis
Source: Springer Nature journal article supplement (doi:10.1038/s41598-023-31477-z), 2023-03-16
Supplement: MOESM1 [file 41598_2023_31477_MOESM1_ESM.pdf]

Supplementary Appendix 1: Search strategy

| Number | Search terms        | Number | Search terms                |
|--------|---------------------|--------|-----------------------------|
| 1      | Virtual reality     | 2      | VR                          |
| 3      | virtual environment | 4      | 1 or 2-3                    |
| 5      | depression          | 6      | depressive disorder         |
| 7      | depressive symptoms | 8      | 5 or 6-7                    |
| 9      | stroke              | 10     | Randomized controlled trial |
| 11     | RCT                 | 12     | Controlled clinical trial   |
| 13     | Randomized          | 14     | Randomly                    |
| 15     | Clinical trials     | 16     | Random                      |
| 17     | 9 or 10-15          | 18     | 4 and 8 and 9 and 17        |
